# Supplementary material
Source: PubMed Central journal article supplement (PMC8767441)

## Supplemental Online Content

Bell EF, Hintz SR, Hansen NI, et al; Eunice Kennedy Shriver National Institute of Child Health and Human Development Neonatal Research Network. Mortality, in-hospital morbidity, care practices, and 2-year outcomes for extremely preterm infants in the US, 2013-2018. *JAMA*. Published January 18, 2022.

doi:10.1001/jama.2021.23580

**eTable 1.** Characteristics of Surviving Children Born at 22-26 Weeks' GA Who Were Lost to Follow-up Versus Seen at 22-26 Months' Corrected Age Follow-up

**eTable 2.** Death and Neurodevelopmental Impairment at 22-26 Months' Corrected Age in Children Born at 22-26 Weeks' GA, 2013-2016

**eTable 3.** Primary Causes for Hospitalizations Since Discharge in Children Born at 22-26 Weeks' GA, 2013-2016

**eFigure 1.** Participant Flow Diagram

**eFigure 2.** Proportion of Infants Who Survived to Discharge or 1 Year by Gestational Age at Birth

**eFigure 3.** Status at 22-26 Months' Corrected Age for 4344 Children Born at 22-26 Weeks' Gestational Age Who Were Eligible for a Follow-up Assessment

**eFigure 4.** Death and Neurodevelopmental Impairment at 22-26 Months' Corrected Age in Children Born at 22-26 Weeks' Gestational Age

**eFigure 5.** Bayley-III Cognitive Composite Scores by Gestational Age at Birth

**eFigure 6.** Bayley-III Language Composite Scores by Gestational Age at Birth

**eFigure 7.** Bayley-III Motor Composite Scores by Gestational Age at Birth

This supplemental material has been provided by the authors to give readers additional information about their work.

**eTable 1. Characteristics of Surviving Children Born at 22-26 Weeks' Gestational Age Who Were Lost to Follow-up Versus Seen at 22-26 Months' Corrected Age Follow-up**

| Characteristics                                | Lost to follow-up | Seen at follow-up <sup>a</sup> | P-value <sup>b</sup> |
|------------------------------------------------|-------------------|--------------------------------|----------------------|
| N                                              | 238               | 2692                           |                      |
| <b>Mother</b>                                  |                   |                                |                      |
| Age, y, median (IQR)                           | 28 (23-32)        | 29 (24-33)                     | 0.04                 |
| Education, <sup>c</sup> n/N (%)                |                   |                                | 0.003                |
| Less than high school                          | 26/199 (13.1)     | 409/2187 (18.7)                |                      |
| High school degree                             | 79/199 (39.7)     | 637/2187 (29.1)                |                      |
| Trade or technical school or some college      | 58/199 (29.1)     | 593/2187 (27.1)                |                      |
| College degree or more                         | 36/199 (18.1)     | 548/2187 (25.1)                |                      |
| Public medical insurance, <sup>d</sup> n/N (%) | 142/238 (59.7)    | 1545/2683 (57.6)               | 0.58                 |
| Ethnicity, n/N (%)                             |                   |                                | 0.17                 |
| Hispanic or Latino                             | 30/238 (12.6)     | 432/2667 (16.2)                |                      |
| Not Hispanic or Latino                         | 208/238 (87.4)    | 2235/2667 (83.8)               |                      |
| Race, n/N (%)                                  |                   |                                | 0.04                 |
| American Indian or Alaska native               | 1/234 (0.4)       | 21/2618 (0.8)                  |                      |
| Asian                                          | 14/234 (6.0)      | 80/2618 (3.1)                  |                      |
| Black                                          | 94/234 (40.2)     | 1113/2618 (42.5)               |                      |
| More than one race                             | 4/234 (1.7)       | 35/2618 (1.3)                  |                      |
| Native Hawaiian or other Pacific islander      | 3/234 (1.3)       | 8/2618 (0.3)                   |                      |
| White                                          | 118/234 (50.4)    | 1361/2618 (52.0)               |                      |
| Multiple gestation, n (%)                      | 59 (24.8)         | 706 (26.2)                     | 0.70                 |
| <b>Infant</b>                                  |                   |                                |                      |
| Sex, n (%)                                     |                   |                                | 1.00                 |
| Female                                         | 119 (50.0)        | 1342 (49.9)                    |                      |
| Male                                           | 119 (50.0)        | 1350 (50.1)                    |                      |
| Gestational age, weeks, n/N (%)                |                   |                                | 0.03                 |
| 22                                             | 0 (0.0)           | 33 (1.2)                       |                      |
| 23                                             | 28 (11.8)         | 307 (11.4)                     |                      |
| 24                                             | 40 (16.8)         | 595 (22.1)                     |                      |
| 25                                             | 65 (27.3)         | 770 (28.6)                     |                      |
| 26                                             | 105 (44.1)        | 987 (36.7)                     |                      |
| Birth weight, g, median (IQR)                  | 780 (645-910)     | 750 (638-867)                  | 0.01                 |
| Small for gestational age, <sup>e</sup> n (%)  | 10 (4.2)          | 169 (6.3)                      | 0.26                 |
| Major birth defect, <sup>f</sup> n/N (%)       | 6/238 (2.5)       | 113/2691 (4.2)                 | 0.30                 |

<sup>a</sup> Children seen at the 22-26 months' corrected age follow-up assessment includes those with a visit, regardless of timing or whether all items were completed. A total of 2692 children were seen: 2458 with all information needed to evaluate for neurodevelopmental impairment, 108 children whose visit included a neurologic exam and Bayley developmental exam but some information needed to determine neurodevelopmental impairment was missing, 22 children with an incomplete visit that did not include a neurologic or Bayley exam, and 104 children whose visit was outside the timeframe for inclusion in analysis.

<sup>b</sup> P-value by Kruskal-Wallis test (maternal age, birth weight), chi-square test, or Fisher's exact test.

<sup>c</sup> Maternal education was assessed at the time of delivery.

<sup>d</sup> Public medical insurance may include Medicaid, a state or federally funded program, or insurance obtained through the Affordable Care Act.

<sup>e</sup> Small for gestational age was defined as less than the 10th percentile for sex and age based on Alexander percentiles.<sup>17</sup>

<sup>f</sup> Major birth defect refers to any syndrome and/or major malformation including chromosomal abnormalities, central nervous system defects, congenital heart defects, gastrointestinal defects, genitourinary defects, skeletal dysplasia, cystic adenomatoid malformation, inborn error of metabolism, and other serious or life-threatening birth defects as included in a list in the Manual of Operations.

**eTable 2. Death and Neurodevelopmental Impairment at 22-26 Months' Corrected Age in Children Born at 22-26 Weeks' GA, 2013-2016**

| Variable <sup>a</sup>                                                                       | 22 weeks       | 23 weeks       | 24 weeks       | 25 weeks       | 26 weeks        | 22-26 wk, 2013-16 |
|---------------------------------------------------------------------------------------------|----------------|----------------|----------------|----------------|-----------------|-------------------|
| Infants potentially eligible for follow-up at 22-26 months' corrected age, <sup>b</sup> N   | 357            | 716            | 930            | 1066           | 1275            | 4344              |
| Status at follow-up, n (%)                                                                  |                |                |                |                |                 |                   |
| Died before discharge                                                                       | 323 (90.5)     | 373 (52.1)     | 282 (30.3)     | 224 (21.0)     | 167 (13.1)      | 1369 (31.5)       |
| Died after discharge                                                                        | 1 (0.3)        | 8 (1.1)        | 13 (1.4)       | 7 (0.7)        | 16 (1.3)        | 45 (1.0)          |
| Lost to follow-up                                                                           | 0 (0.0)        | 28 (3.9)       | 40 (4.3)       | 65 (6.1)       | 105 (8.2)       | 238 (5.5)         |
| Seen but visit incomplete or not when expected <sup>c</sup>                                 | 2 (0.6)        | 15 (2.1)       | 28 (3.0)       | 37 (3.5)       | 44 (3.5)        | 126 (2.9)         |
| Seen and have key form but missing neurodevelopmental impairment                            | 2 (0.6)        | 8 (1.1)        | 16 (1.7)       | 31 (2.9)       | 51 (4.0)        | 108 (2.5)         |
| Seen and evaluated for neurodevelopmental impairment                                        | 29 (8.1)       | 284 (39.7)     | 551 (59.2)     | 702 (65.9)     | 892 (70.0)      | 2458 (56.6)       |
| Surviving children evaluated at follow-up, n/N (%)                                          | 31/33 (93.9)   | 292/335 (87.2) | 567/635 (89.3) | 733/835 (87.8) | 943/1092 (86.4) | 2566/2930 (87.6)  |
| Surviving children evaluated for neurodevelopmental impairment, n/N (%)                     | 29/33 (87.9)   | 284/335 (84.8) | 551/635 (86.8) | 702/835 (84.1) | 892/1092 (81.7) | 2458/2930 (83.9)  |
| Infants evaluated for neurodevelopmental impairment <sup>d</sup> , n/N (%)                  |                |                |                |                |                 |                   |
| No/mild neurodevelopmental impairment                                                       | 13/29 (44.8)   | 88/284 (31.0)  | 219/551 (39.7) | 360/702 (51.3) | 518/892 (58.1)  | 1198/2458 (48.7)  |
| Moderate or severe neurodevelopmental impairment                                            | 16/29 (55.2)   | 196/284 (69.0) | 332/551 (60.3) | 342/702 (48.7) | 374/892 (41.9)  | 1260/2458 (51.3)  |
| Moderate neurodevelopmental impairment                                                      | 7/29 (24.1)    | 96/278 (34.5)  | 163/539 (30.2) | 210/695 (30.2) | 233/878 (26.5)  | 709/2419 (29.3)   |
| Severe neurodevelopmental impairment                                                        | 9/29 (31.0)    | 94/278 (33.8)  | 157/539 (29.1) | 125/695 (18.0) | 127/878 (14.5)  | 512/2419 (21.2)   |
| Infants who died or were evaluated for neurodevelopmental impairment <sup>d</sup> , n/N (%) |                |                |                |                |                 |                   |
| Died before follow-up                                                                       | 324/353 (91.8) | 381/665 (57.3) | 295/846 (34.9) | 231/933 (24.8) | 183/1075 (17.0) | 1414/3872 (36.5)  |
| Died before discharge                                                                       | 323/353 (91.5) | 373/665 (56.1) | 282/846 (33.3) | 224/933 (24.0) | 167/1075 (15.5) | 1369/3872 (35.4)  |

| Variable <sup>a</sup>                                                                                                 | 22 weeks         | 23 weeks          | 24 weeks          | 25 weeks          | 26 weeks           | 22-26 wk,<br>2013-16 |
|-----------------------------------------------------------------------------------------------------------------------|------------------|-------------------|-------------------|-------------------|--------------------|----------------------|
| Died after discharge                                                                                                  | 1/353 (0.3)      | 8/665 (1.2)       | 13/846 (1.5)      | 7/933 (0.8)       | 16/1075<br>(1.5)   | 45/3872 (1.2)        |
| Survived with no or mild neurodevelopmental impairment                                                                | 13/353 (3.7)     | 88/665<br>(13.2)  | 219/846<br>(25.9) | 360/933<br>(38.6) | 518/1075<br>(48.2) | 1198/3872<br>(30.9)  |
| Survived with moderate or severe neurodevelopmental impairment                                                        | 16/353 (4.5)     | 196/665<br>(29.5) | 332/846<br>(39.2) | 342/933<br>(36.7) | 374/1075<br>(34.8) | 1260/3872<br>(32.5)  |
| Survived with moderate neurodevelopmental impairment                                                                  | 7/353 (2.0)      | 96/659<br>(14.6)  | 163/834<br>(19.5) | 210/926<br>(22.7) | 233/1061<br>(22.0) | 709/3833<br>(18.5)   |
| Survived with severe neurodevelopmental impairment                                                                    | 9/353 (2.5)      | 94/659<br>(14.3)  | 157/834<br>(18.8) | 125/926<br>(13.5) | 127/1061<br>(12.0) | 512/3833<br>(13.4)   |
| Infants actively treated at birth who died or were evaluated for neurodevelopmental impairment <sup>d</sup> , n/N (%) |                  |                   |                   |                   |                    |                      |
| Died before follow-up                                                                                                 | 83/112<br>(74.1) | 287/571<br>(50.3) | 277/828<br>(33.5) | 219/921<br>(23.8) | 176/1068<br>(16.5) | 1042/3500<br>(29.8)  |
| Died before discharge                                                                                                 | 82/112<br>(73.2) | 279/571<br>(48.9) | 264/828<br>(31.9) | 212/921<br>(23.0) | 160/1068<br>(15.0) | 997/3500<br>(28.5)   |
| Died after discharge                                                                                                  | 1/112 (0.9)      | 8/571 (1.4)       | 13/828 (1.6)      | 7/921 (0.8)       | 16/1068<br>(1.5)   | 45/3500 (1.3)        |
| Survived with no or mild neurodevelopmental impairment                                                                | 13/112<br>(11.6) | 88/571<br>(15.4)  | 219/828<br>(26.4) | 360/921<br>(39.1) | 518/1068<br>(48.5) | 1198/3500<br>(34.2)  |
| Survived with moderate or severe neurodevelopmental impairment                                                        | 16/112<br>(14.3) | 196/571<br>(34.3) | 332/828<br>(40.1) | 342/921<br>(37.1) | 374/1068<br>(35.0) | 1260/3500<br>(36.0)  |
| Survived with moderate neurodevelopmental impairment                                                                  | 7/112 (6.3)      | 96/565<br>(17.0)  | 163/816<br>(20.0) | 210/914<br>(23.0) | 233/1054<br>(22.1) | 709/3461<br>(20.5)   |
| Survived with severe neurodevelopmental impairment                                                                    | 9/112 (8.0)      | 94/565<br>(16.6)  | 157/816<br>(19.2) | 125/914<br>(13.7) | 127/1054<br>(12.0) | 512/3461<br>(14.8)   |

<sup>a</sup> Differences in neurodevelopmental impairment by gestational age were significant, adjusted  $p < 0.001$ , adjusting for study center, SGA, male sex, multiple gestation, maternal race/ethnicity (Black, White, Hispanic, other), and maternal education assessed at the time of delivery (< high school degree, high school degree, > high school degree, unknown).

<sup>b</sup> Corrected age represents the age of the child from the expected date of delivery. It is calculated by subtracting the number of weeks born before 40 weeks of gestation from the chronological age.<sup>15</sup>

<sup>c</sup> 22 children had some follow-up information but lacked key information (child examination, Bayley assessment). The remaining 104 children were seen outside of the expected time for inclusion in analysis, namely, one child was seen at <18 months' corrected age and 103 were seen at >30 months' corrected age.

<sup>d</sup> Mild or no neurodevelopmental impairment (NDI) was defined as Bayley-III cognitive composite score  $\geq 85$ , Bayley-III motor composite score  $\geq 85$ , and Gross Motor Function Classification System (GMFCS, Palisano<sup>25</sup>) level 0 or 1. Moderate NDI was defined by any of: Bayley-III cognitive composite score or motor composite score 70-84, GMFCS level 2 or 3. Severe NDI was defined by any of: Bayley-III cognitive composite score or motor composite score <70, GMFCS level 4 or 5, bilateral blindness, or severe hearing impairment. Moderate-to-severe NDI was defined by any of the following: Bayley-III cognitive composite score or motor composite score <85, GMFCS level  $\geq 2$  with or without CP, bilateral blindness, or severe hearing impairment. For 39 children with moderate-to-severe NDI, specific level of severity could not be determined due to missing data. Thus, the denominator for moderate and severe levels is smaller than the denominator for combined moderate or severe NDI. The Bayley-III is a standardized developmental exam that was performed at the in-person study visit by experienced examiners who were certified annually.

**eTable 3. Primary Causes for Hospitalizations Since Discharge in Children Born at 22-26 Weeks' GA, 2013-2016**

| Variable                                                                                             | 22 weeks  | 23 weeks   | 24 weeks   | 25 weeks   | 26 weeks   | 22-26 weeks |
|------------------------------------------------------------------------------------------------------|-----------|------------|------------|------------|------------|-------------|
| N infants hospitalized since discharge                                                               | 20        | 171        | 311        | 360        | 415        | 1277        |
| N infants hospitalized with non-missing causes                                                       | 19        | 171        | 306        | 359        | 413        | 1268        |
|                                                                                                      |           |            |            |            |            |             |
| Total no. of hospitalizations                                                                        | 60        | 405        | 745        | 864        | 906        | 2980        |
| Total no. of hospitalizations with non-missing cause                                                 | 57        | 405        | 739        | 861        | 902        | 2964        |
| Primary cause, n (% of total hospitalizations with non-missing cause)                                |           |            |            |            |            |             |
| Respiratory                                                                                          | 37 (64.9) | 205 (50.6) | 418 (56.6) | 467 (54.2) | 474 (52.5) | 1601 (54.0) |
| Surgery <sup>a</sup>                                                                                 | 7 (12.3)  | 67 (16.5)  | 99 (13.4)  | 137 (15.9) | 146 (16.2) | 456 (15.4)  |
| Infection <sup>b</sup>                                                                               | 7 (12.3)  | 41 (10.1)  | 80 (10.8)  | 59 (6.9)   | 88 (9.8)   | 275 (9.3)   |
| Growth and nutrition <sup>c</sup>                                                                    | 2 (3.5)   | 20 (4.9)   | 45 (6.1)   | 48 (5.6)   | 39 (4.3)   | 154 (5.2)   |
| Vomiting/diarrhea/dehydration                                                                        | 2 (3.5)   | 21 (5.2)   | 21 (2.8)   | 33 (3.8)   | 34 (3.8)   | 111 (3.7)   |
| Reflux <sup>d</sup>                                                                                  | 0 (0.0)   | 1 (0.2)    | 5 (0.7)    | 13 (1.5)   | 5 (0.6)    | 24 (0.8)    |
| CNS <sup>e</sup>                                                                                     | 1 (1.8)   | 23 (5.7)   | 25 (3.4)   | 27 (3.1)   | 28 (3.1)   | 104 (3.5)   |
| Apnea/BRUE                                                                                           | 0 (0.0)   | 3 (0.7)    | 7 (0.9)    | 12 (1.4)   | 15 (1.7)   | 37 (1.2)    |
| Sleep study                                                                                          | 0 (0.0)   | 3 (0.7)    | 6 (0.8)    | 11 (1.3)   | 11 (1.2)   | 31 (1.0)    |
| Trauma (accidental) <sup>f</sup>                                                                     | 1 (1.8)   | 4 (1.0)    | 6 (0.8)    | 9 (1.0)    | 15 (1.7)   | 35 (1.2)    |
| Trauma (non-accidental) <sup>g</sup>                                                                 | 0 (0.0)   | 0 (0.0)    | 1 (0.1)    | 1 (0.1)    | 4 (0.4)    | 6 (0.2)     |
| Environmental <sup>h</sup>                                                                           | 0 (0.0)   | 0 (0.0)    | 0 (0.0)    | 2 (0.2)    | 1 (0.1)    | 3 (0.1)     |
| Chemotherapy                                                                                         | 0 (0.0)   | 5 (1.2)    | 0 (0.0)    | 9 (1.0)    | 1 (0.1)    | 15 (0.5)    |
| Other                                                                                                | 0 (0.0)   | 12 (3.0)   | 26 (3.5)   | 33 (3.8)   | 41 (4.5)   | 112 (3.8)   |
| Any admission due to cause shown, n (% of infants hospitalized with non-missing causes) <sup>i</sup> |           |            |            |            |            |             |
| Respiratory                                                                                          | 15 (78.9) | 107 (62.6) | 194 (63.4) | 216 (60.2) | 262 (63.4) | 794 (62.6)  |
| Surgery <sup>a</sup>                                                                                 | 6 (31.6)  | 52 (30.4)  | 87 (28.4)  | 114 (31.8) | 108 (26.2) | 367 (28.9)  |
| Infection <sup>b</sup>                                                                               | 5 (26.3)  | 31 (18.1)  | 53 (17.3)  | 50 (13.9)  | 56 (13.6)  | 195 (15.4)  |
| Growth and nutrition <sup>c</sup>                                                                    | 2 (10.5)  | 14 (8.2)   | 35 (11.4)  | 32 (8.9)   | 33 (8.0)   | 116 (9.1)   |
| Vomiting/diarrhea/dehydration                                                                        | 2 (10.5)  | 12 (7.0)   | 18 (5.9)   | 25 (7.0)   | 22 (5.3)   | 79 (6.2)    |
| Reflux <sup>d</sup>                                                                                  | 0 (0.0)   | 1 (0.6)    | 5 (1.6)    | 12 (3.3)   | 5 (1.2)    | 23 (1.8)    |
| CNS <sup>e</sup>                                                                                     | 1 (5.3)   | 18 (10.5)  | 17 (5.6)   | 19 (5.3)   | 17 (4.1)   | 72 (5.7)    |
| Apnea/BRUE                                                                                           | 0 (0.0)   | 3 (1.8)    | 7 (2.3)    | 12 (3.3)   | 15 (3.6)   | 37 (2.9)    |
| Sleep study                                                                                          | 0 (0.0)   | 2 (1.2)    | 6 (2.0)    | 11 (3.1)   | 9 (2.2)    | 28 (2.2)    |
| Trauma (accidental) <sup>f</sup>                                                                     | 1 (5.3)   | 4 (2.3)    | 6 (2.0)    | 8 (2.2)    | 12 (2.9)   | 31 (2.4)    |
| Trauma (non-accidental) <sup>g</sup>                                                                 | 0 (0.0)   | 0 (0.0)    | 1 (0.3)    | 1 (0.3)    | 2 (0.5)    | 4 (0.3)     |
| Environmental <sup>h</sup>                                                                           | 0 (0.0)   | 0 (0.0)    | 0 (0.0)    | 2 (0.6)    | 1 (0.2)    | 3 (0.2)     |

| Variable     | 22 weeks | 23 weeks | 24 weeks | 25 weeks | 26 weeks | 22-26 weeks |
|--------------|----------|----------|----------|----------|----------|-------------|
| Chemotherapy | 0 (0.0)  | 1 (0.6)  | 0 (0.0)  | 1 (0.3)  | 1 (0.2)  | 3 (0.2)     |
| Other        | 0 (0.0)  | 12 (7.0) | 25 (8.2) | 26 (7.2) | 31 (7.5) | 94 (7.4)    |

CNS, central nervous system; BRUE, brief resolved unexplained event.

- <sup>a</sup> Includes tracheostomy, gastrostomy, tympanostomy, interventions for retinopathy of prematurity, and other surgical procedures.
- <sup>b</sup> Includes sepsis, meningitis, pneumonia, fever, shunt infection, ear infection, upper respiratory infection (URI), respiratory syncytial virus (RSV).
- <sup>c</sup> Includes poor growth, failure to thrive.
- <sup>d</sup> Admissions associated with gastroesophageal reflux disease (GERD).
- <sup>e</sup> Includes seizures, shunt malfunction.
- <sup>f</sup> Includes fractures, head injury, burns and lacerations requiring suturing.
- <sup>g</sup> Includes trauma resulting from abuse, neglect.
- <sup>h</sup> Includes accidental ingestion of toxic or potentially toxic substances, abuse, neglect.
- <sup>i</sup> Children may have been hospitalized for the same or different reasons across multiple admissions. Therefore, numerator counts of any cause do not add to the number of children

**eFigure 1. Participant Flow Diagram**

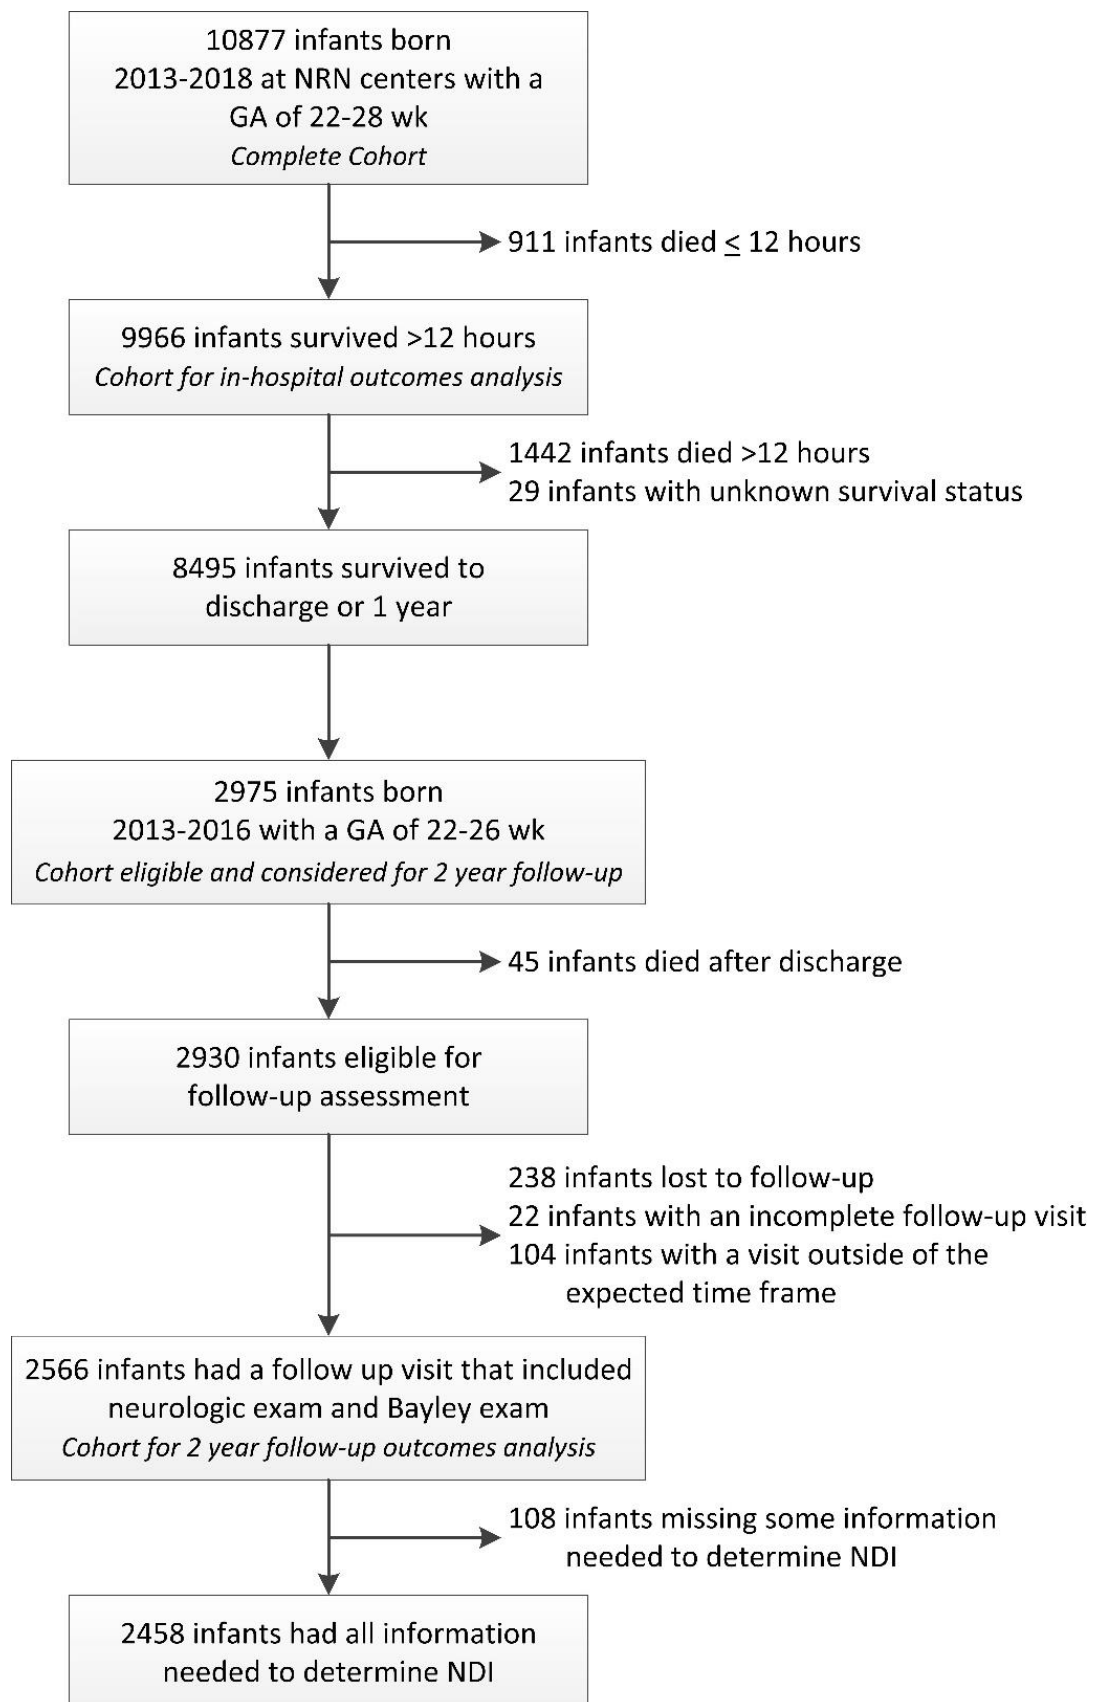

**eFigure 2. Proportion of Infants Who Survived to Discharge or 1 Year by Gestational Age at Birth**

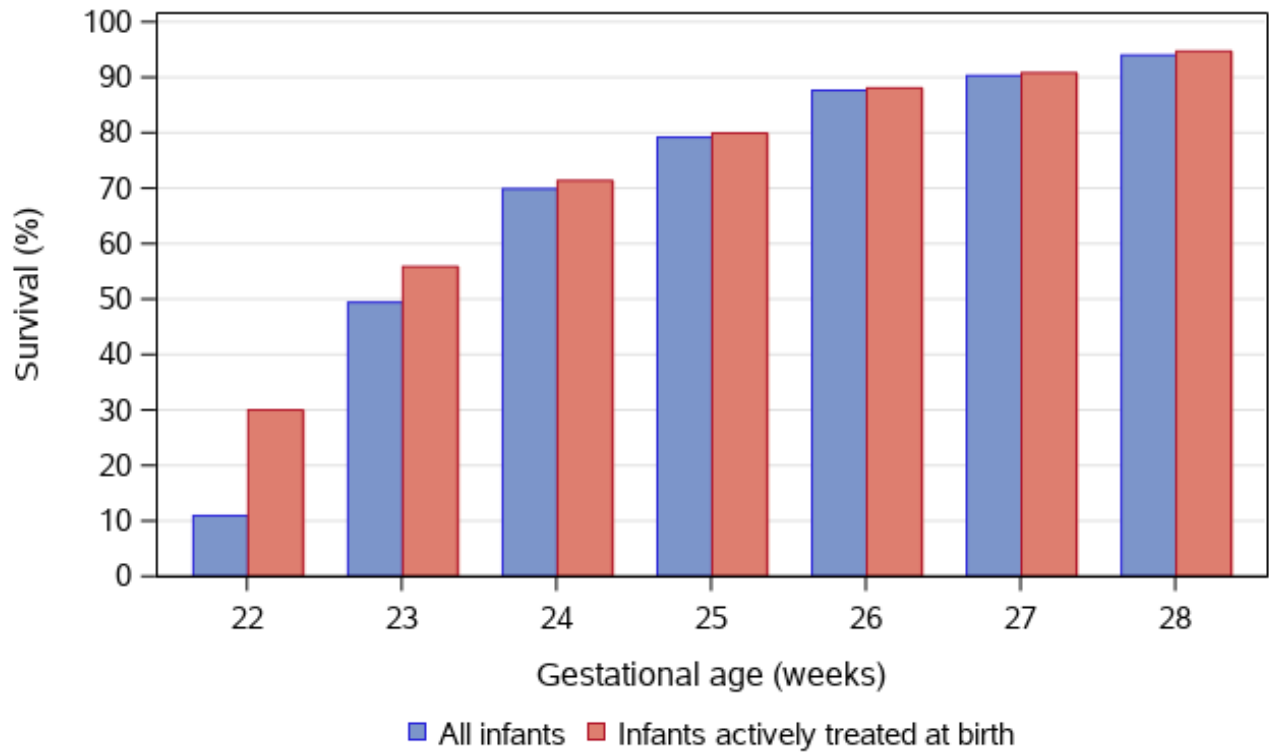



### eFigure 3. Status at 22-26 Months' Corrected Age for 4344 Children Born at 22-26 Weeks' Gestational Age Who Were Eligible for a Follow-up Assessment

NDI=neurodevelopmental impairment. Areas in green represent all children who were seen at follow-up. Overall, 2458 children had all information necessary to evaluate for NDI. An additional 108 children had key forms (child exam and Bayley assessment) but lacked some information to evaluate for NDI. "Seen but visit incomplete or outside timing" includes 22 children who were seen at follow-up but lacked key forms and 104 children who were seen outside of the window allowed for inclusion in analysis, namely one child who was seen at <18 months' corrected age and 103 who were seen at >30 months' corrected age.

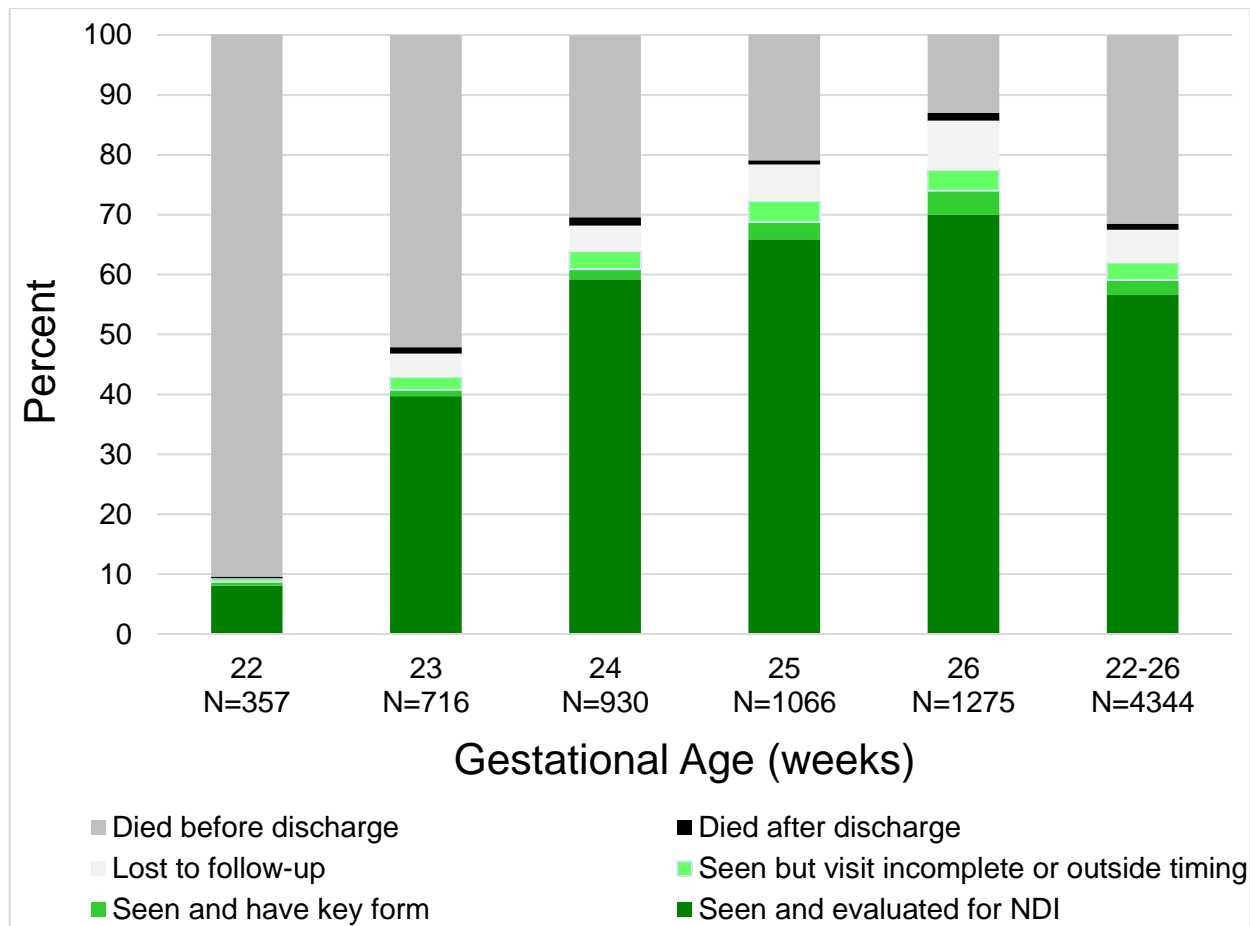

### eFigure 4. Death and Neurodevelopmental Impairment at 22-26 Months' Corrected Age in Children Born at 22-26 Weeks' Gestational Age

NDI=neurodevelopmental impairment. Children born at 22-26 weeks' gestational age were eligible for a follow-up assessment at 22-26 months' corrected age. Proportions are shown for the 3872 children who had died by 22-26 months' corrected age or were seen at follow-up and evaluated for neurodevelopmental impairment. Children who were actively treated at birth and those who were not actively treated at birth are included.

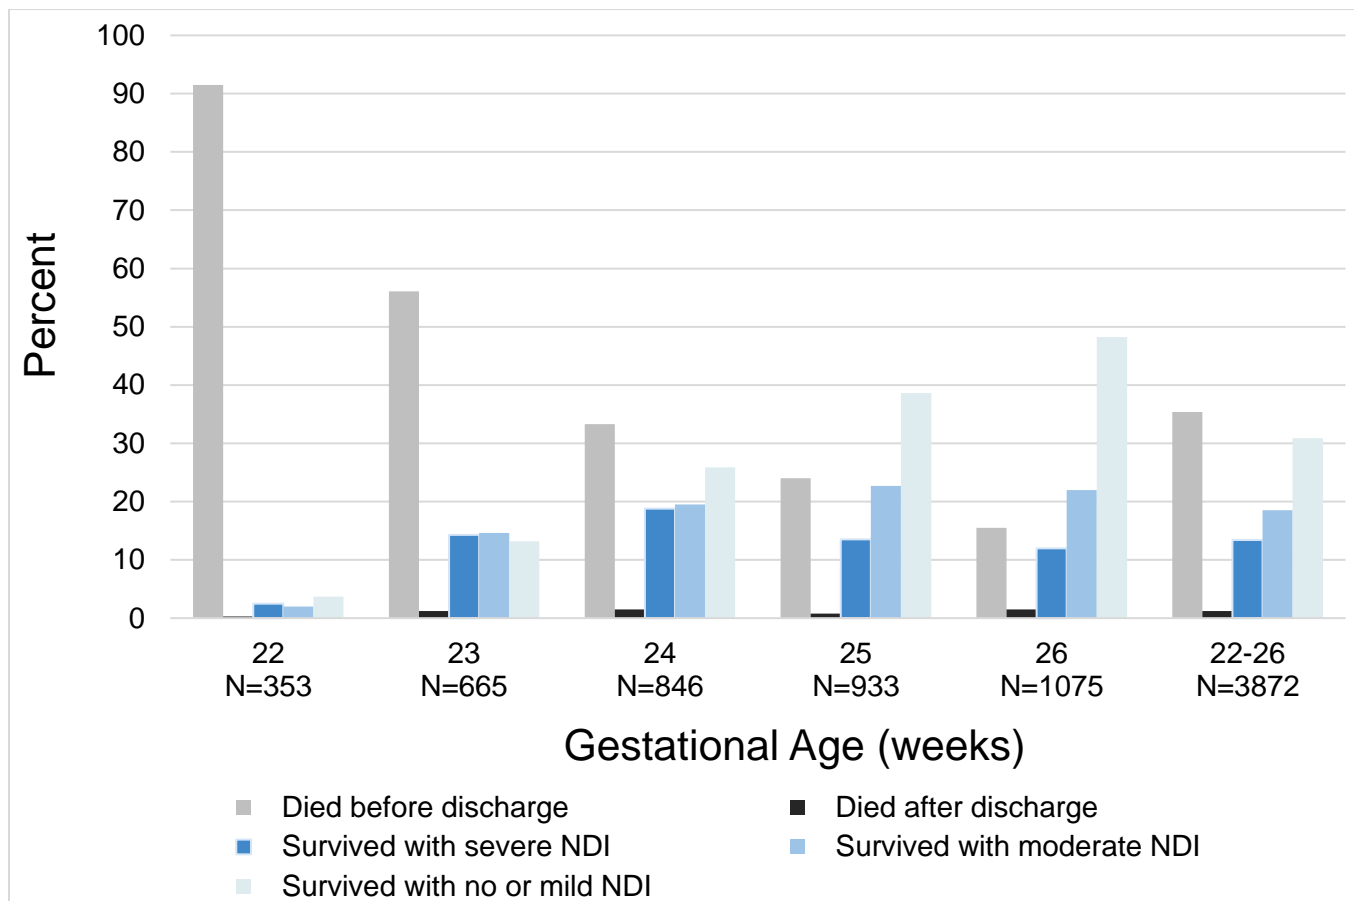

### eFigure 5. Bayley-III Cognitive Composite Scores by Gestational Age at Birth

The red diamond shows the mean. The bottom line of the box shows the 25<sup>th</sup> percentile, the middle line shows the median, and the top line shows the 75<sup>th</sup> percentile. The crosses indicate individual scores.

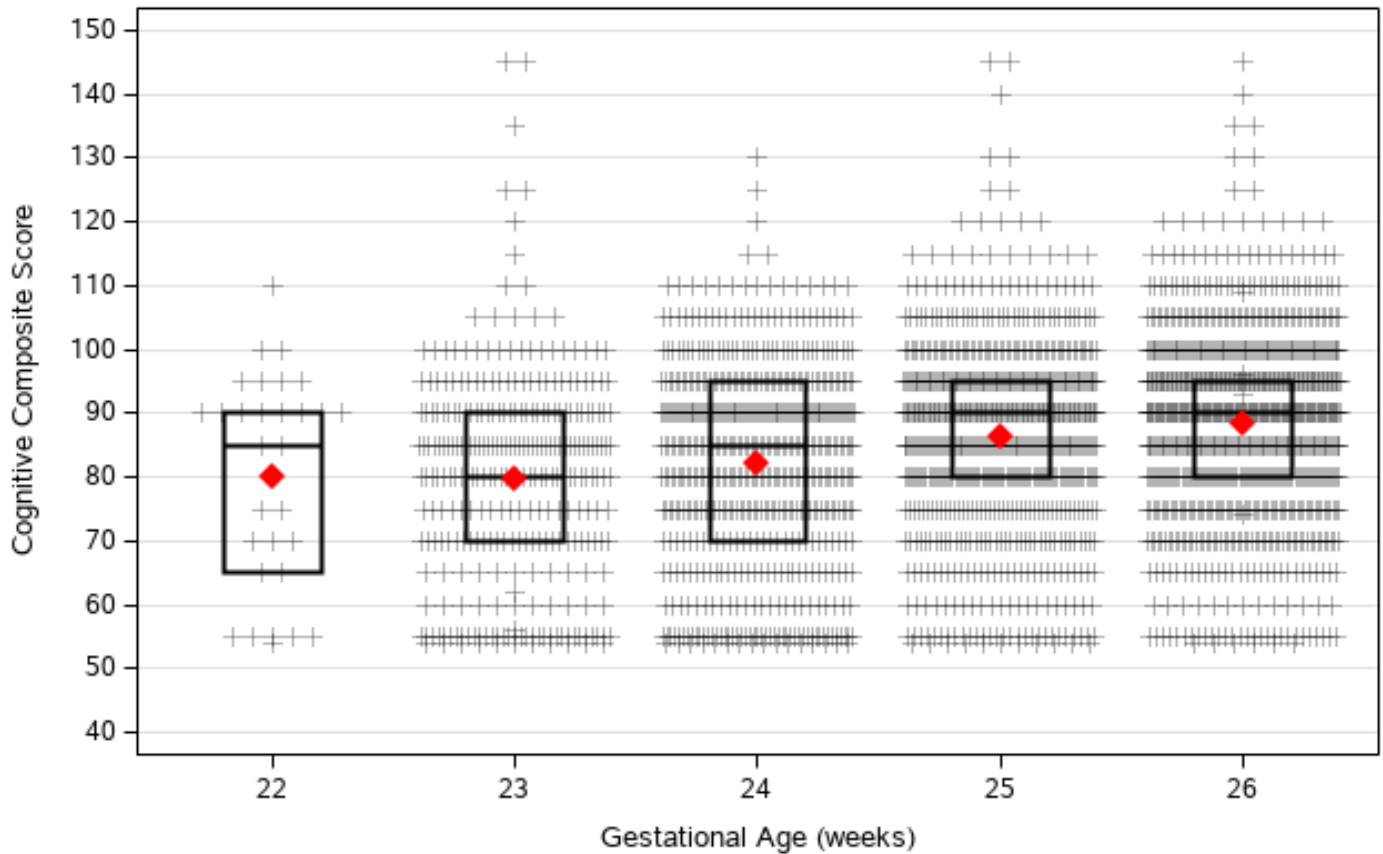

### eFigure 6. Bayley-III Language Composite Scores by Gestational Age at Birth

The red diamond shows the mean. The bottom line of the box shows the 25<sup>th</sup> percentile, the middle line shows the median, and the top line shows the 75<sup>th</sup> percentile. The crosses indicate individual scores.

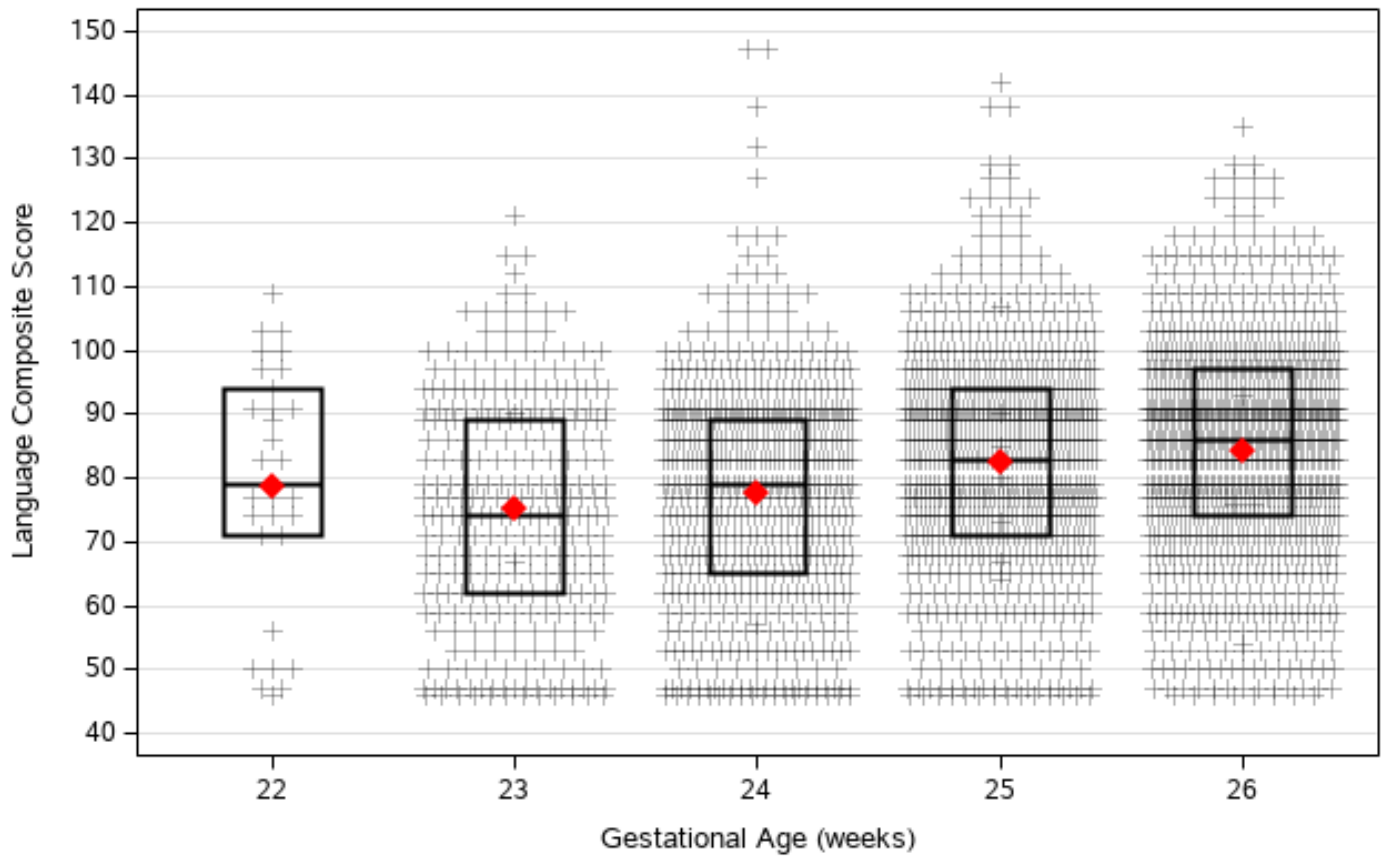

### eFigure 7. Bayley-III Motor Composite Scores by Gestational Age at Birth

The red diamond shows the mean. The bottom line of the box shows the 25<sup>th</sup> percentile, the middle line shows the median, and the top line shows the 75<sup>th</sup> percentile. The crosses indicate individual scores.

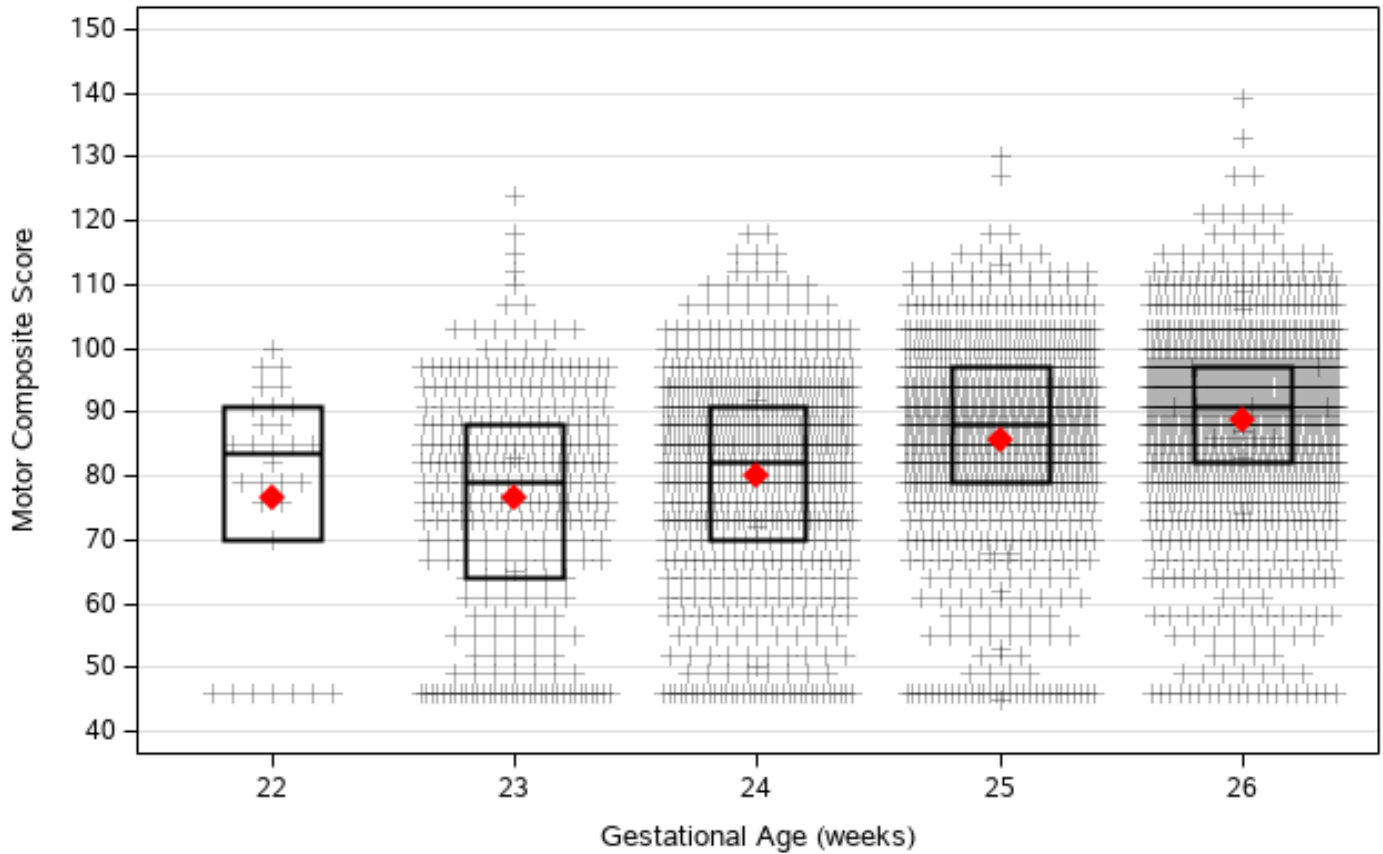

Supplement: jama-e2123580-s001.pdf [file jama-e2123580-s001.pdf]
